1 **Measuring genetic variation in the multi-ethnic Million Veteran Program (MVP)**

2 Haley Hunter-Zinck,<sup>1,14</sup> Yunling Shi,<sup>1,14</sup> Man Li,<sup>1,2,14</sup> Bryan R. Gorman,<sup>1,3,14</sup> Sun-Gou Ji,<sup>1,4,14</sup> Ning Sun,<sup>5,6,14</sup>  
3 Teresa Webster,<sup>7</sup> Andrew Liem,<sup>1,3</sup> Paul Hsieh,<sup>1</sup> Poornima Devineni,<sup>1</sup> Purushotham Karnam,<sup>1</sup> Lakshmi  
4 Radhakrishnan,<sup>7</sup> Jeanette Schmidt,<sup>7</sup> Themistocles L. Assimes,<sup>8,9</sup> Jie Huang,<sup>1</sup> Cuiping Pan,<sup>8,9</sup> Donald  
5 Humphries,<sup>1</sup> Mary Brophy,<sup>1</sup> Jennifer Moser,<sup>10</sup> Sumitra Muralidhar,<sup>10</sup> Grant D. Huang,<sup>10</sup> Ronald  
6 Przygodzki,<sup>10</sup> John Concato,<sup>5,6</sup> John M. Gaziano,<sup>1,11</sup> Joel Gelernter,<sup>5,6</sup> Christopher J. O'Donnell,<sup>1</sup> Elizabeth  
7 R. Hauser,<sup>12,13</sup> Hongyu Zhao,<sup>5,6</sup> Timothy J. O'Leary,<sup>10</sup> Philip S. Tsao,<sup>8,9</sup> Saiju Pyarajan,<sup>1,11,15,\*</sup> on behalf of  
8 the VA Million Veteran Program<sup>^</sup>.

9 <sup>1</sup>VA Boston Healthcare System, VA Cooperative Studies Program, VA Boston Healthcare System, Boston,  
10 MA 02130, USA

11 <sup>2</sup>Department of Internal Medicine, University of Utah School of Medicine, Salt Lake City, UT 84132, USA

12 <sup>3</sup>Booz Allen Hamilton Inc., McLean, VA 22102, USA

13 <sup>4</sup>Seven Bridges Inc., Charlestown, MA 02129, USA

14 <sup>5</sup>VA Connecticut Healthcare System, VA Cooperative Studies Program, West Haven, CT 06516, USA

15 <sup>6</sup>Yale University School of Medicine, New Haven, CT 06510, USA

16 <sup>7</sup>Thermo Fisher Scientific, Santa Clara, CA 95054, USA

17 <sup>8</sup>VA Palo Alto Health Care System, Palo Alto, CA 94304, USA

18 <sup>9</sup>Department of Medicine, Stanford University School of Medicine, Stanford, CA 94305, USA

19 <sup>10</sup>Office of Research and Development (ORD), Veterans Health Administration, Washington DC 20571,  
20 USA

21 <sup>11</sup>Department of Medicine, Brigham and Women's Hospital and Harvard School of Medicine, Boston, MA  
22 02115, USA

23 <sup>12</sup>Durham VA Health System, Durham, NC 27705, USA

24 <sup>13</sup>Department of Medicine, Duke University, Durham, NC 27617, USA

25 <sup>14</sup>These authors contributed equally to this work

26 <sup>15</sup>Present address: VA Boston Healthcare System, 150 S. Huntington Avenue (MAV151), Boston, MA  
27 02130, USA

28 \*Correspondance: [Saiju.Pyarajan@va.gov](mailto:Saiju.Pyarajan@va.gov) (S.P)

29 <sup>^</sup>Million Veteran Program membership is provided in the acknowledgement

30

31

32 Running title: Million Veteran Program (MVP) genotype array data QA/QC

33 Keywords: VA, Million Veteran Program, genotype data, quality control, genetic ancestry, genetic  
34 relatedness

## 35 **Abstract**

36 The Million Veteran Program (MVP), initiated by the Department of Veterans Affairs (VA), aims to collect  
37 consented biosamples from at least one million Veterans. Presently, blood samples have been collected  
38 from over 800,000 enrolled participants. The size and diversity of the MVP cohort, as well as the  
39 availability of extensive VA electronic health records make it a promising resource for precision  
40 medicine. MVP is conducting array-based genotyping to provide genome-wide scan of the entire cohort,  
41 in parallel with whole genome sequencing, methylation, and other omics assays. Here, we present the  
42 design and performance of MVP 1.0 custom Axiom® array, which was designed and developed as a  
43 single assay to be used across the multi-ethnic MVP cohort. A unified genetic quality control analysis  
44 was developed and conducted on an initial tranche of 485,856 individuals leading to a high-quality  
45 dataset of 459,777 unique individuals. 668,418 genetic markers passed quality control and showed high  
46 quality genotypes not only on common variants but also on rare variants. We confirmed the substantial  
47 ancestral diversity of MVP with nearly 30% non-European individuals, surpassing other large biobanks.  
48 We also demonstrated the quality of the MVP dataset by replicating established genetic associations  
49 with height in European Americans and African Americans ancestries. This current data set has been  
50 made available to approved MVP researchers for genome-wide association studies and other  
51 downstream analyses. Further data releases will be available for analysis as recruitment at the VA  
52 continues and the cohort expands both in size and diversity.

## 53 **Introduction**

54 The Department of Veterans Affairs (VA) initiated the Million Veteran Program (MVP) in 2011 to  
55 create a mega-biobank of at least one million samples with genetic data linked to nationally  
56 consolidated longitudinal clinical records<sup>1</sup>. The initial and continuing goal of MVP is to create a national

57 resource for research to improve the health of United States Veterans and, more generally, to  
58 contribute to our understanding of human health. MVP has currently collected samples from over  
59 800,000 Veteran participants and with continued recruitment efforts expects to exceed a total of 1  
60 million participants in the next 2 to 3 years.

61 While MVP is similar in some respects to other large biobank projects such as the UK Biobank,  
62 the Kaiser Permanente Research Program on Genes, Environment, and Health (RPGEH), the China  
63 Kadoorie Biobank (CKB), and the DiscovEHR initiative<sup>2-4</sup>, it is unique in several ways. MVP is one of the  
64 largest single biobanking efforts to date, satisfying the need for larger genetic datasets while also  
65 benefiting from a very rich, nationally integrated longitudinal clinical database housed in the largest  
66 consolidated healthcare network in the United States. This feature allows for enhanced clinical  
67 phenotyping capabilities. The availability of additional self-reported health and lifestyle survey  
68 information augments clinical data from the Veterans Information Systems and Technology Architecture  
69 (VistA) – the VA’s Electronic Health Record (EHR).

70 Furthermore, with over 29% of participants self-reporting non-white ethnicity, MVP has  
71 substantial diversity in genetic ancestry, meeting a pressing need for greater diversity in genome-wide  
72 association analyses to discover novel associations, reduce false positives, and increase research equity<sup>5-</sup>  
73 <sup>8</sup>. As such, the MVP cohort provides an unprecedented opportunity for increasing the power of genome-  
74 wide association studies (GWAS) and will enable association discoveries for clinically important low  
75 frequency and rare variants possible only in larger sample sizes. Reliable typing of these variants may  
76 provide explanations of missing genetic susceptibility in complex or non-Mendelian diseases. However,  
77 the genetic diversity of MVP also poses challenges in genotype quality control.

78 In this report, we introduce the first installment of MVP genotype data consisting of 459,777  
79 samples surveyed at 668,418 markers. In brief, we 1) describe the design of a research genotyping array  
80 with emphasis on clinically useful and/or rare variants applicable to multi-ethnic backgrounds; 2)

81 describe the generation and quality control of genotyping data; 3) highlight some of the unique features  
82 of the current MVP dataset, including exploratory analyses of genetic ancestry; and 4) replicate effect  
83 sizes of previously reported variants associated with height in European Americans and African  
84 Americans. Overall, we find that the MVP genetic dataset, linked to deep phenotypic data, is a high-  
85 quality and diverse resource for performing genetic analyses.

## 86 **Materials and Methods**

### 87 **Human subjects and data and sample collection**

88 The VA Central Institutional Review Board (IRB), as well as the local IRBs at the VA Boston  
89 Healthcare System and the VA Connecticut Healthcare System, approved this project. An overview of  
90 the recruitment strategies and protocols is given in a previous publication<sup>1</sup>. Briefly, participants were  
91 recruited from approximately 60 VA healthcare facilities across the United States on a rolling basis.  
92 Informed consent was obtained from all participants. Participants consented to a blood draw and to  
93 have their DNA analyzed, as well as to linking their genetic information with their full clinical, survey and  
94 other health data. Participants were also invited to answer two separate surveys about basic  
95 demographic information and lifestyle characteristics.

96 Blood drawn from consenting participants was shipped to the central biorepository in Boston,  
97 Massachusetts where DNA was extracted and later shipped to two external vendors for genotyping on a  
98 custom Axiom<sup>®</sup> array designed specifically for MVP (MVP 1.0). A description of the MVP 1.0 array design  
99 features is detailed in Supplementary Materials.

### 100 **Thermo Fisher Scientific (formally Affymetrix) Axiom<sup>®</sup> Genotyping Platform**

101 The MVP 1.0 custom Axiom<sup>®</sup> array is based on the Axiom<sup>®</sup> Genotyping Platform. The Axiom  
102 genotyping platform utilizes a two-color, ligation-based assay using 30-mer oligonucleotide probes

103 synthesized *in situ* onto a microarray substrate. Each single nucleotide polymorphism (SNP) feature  
104 contains a unique oligomeric sequence complementary to the genomic sequence flanking the  
105 polymorphic site on either the forward or the reverse strand. Solution probes bearing attachment sites  
106 for one of two dyes depending on the 3' (SNP-site) base (A or T, versus C or G) are hybridized to the  
107 target complex, followed by ligation for specificity. Oligonucleotide sequences complementary to the  
108 forward or reverse strands are referred to as probesets. A marker (SNP or indel) can be interrogated by  
109 the forward and/or reverse strand probeset.

110 For additional details of the Axiom® Genotyping Platform, see the Supplemental Materials and  
111 Methods.

## 112 **Genotype calling**

113 We received unprocessed Axiom® genotype data for 485,856 unique samples assayed by two  
114 vendors, referred to as Vendor 1 and Vendor 2, and performed genotype calling in batches grouped by  
115 vendor and sample processing date. Using data provided by the vendors and generated from our  
116 internal genotype calling process (see Supplemental Materials and Methods for details), we first  
117 analyzed the standard Axiom® genotype quality metrics and compared these metrics between the two  
118 vendors.

119 After calling genotypes, we applied an advanced normalization procedure for mitigating plate-  
120 to-plate variation developed in collaboration with ThermoFisher Scientific Inc. The procedure was  
121 applied selectively on a per-batch basis to probesets exhibiting high plate-to-plate variance. After plate  
122 normalization, we applied standard marker quality control procedures to clean and harmonize genotype  
123 calls across all the batches (Supplemental Materials and Methods), followed by advanced sample QC.

## 124 **Advanced sample QC**

### 125 Sample contamination

126 To detect and mitigate sample contamination, we assessed heterozygosity with PLINK, version  
127 1.9, by calculating the F coefficient and quarantining samples with an F coefficient of less than -0.1. We  
128 assessed excess relatedness by using the relatedness inference software KING, version 2.0, and  
129 quarantined samples having a kinship coefficient of at least 0.1 with 7 or more other samples within  
130 MVP. These samples had high dish QC (DQC) and low call rates and were outliers compared to the  
131 majority of samples in the MVP dataset (Figure S5D). Because a call rate below 98.5% correlated with  
132 excess sample heterozygosity or relatedness, we removed samples (15,436, or 3.00%) with call rates  
133 below this threshold<sup>9</sup>. All samples that were removed or quarantined from the current release of MVP  
134 data will be re-genotyped and included in the future data releases.

### 135 Sample mislabeling

136 We identified samples and plates demonstrating potential mislabeling issues by analyzing  
137 genotype concordance between intentional duplicate samples that were sent blinded to the vendors as  
138 new samples for genotyping. Of the 25,867 intentional duplicate pairs, only 211 (0.82%) pairs were  
139 highly discordant (greater than 1% discordance). Samples on plates with discordant intentional duplicate  
140 pairs were quarantined for further analysis and re-genotyping. We also removed both samples and  
141 plates if the duplicate pair had a relatedness coefficient of less than 0.45. These precautions were taken  
142 due to the concern of potential plate swaps and led to 9,975 samples being quarantined.

## 143 Sample misidentification

144 To discriminate between misidentified intentional duplicates (same samples intentionally  
145 genotyped twice), technical duplicates (controls repeatedly genotyped by vendors), and monozygotic  
146 twins, we calculated sample relatedness with the KING software, version 2.1<sup>10</sup>. Monozygotic twins were  
147 confirmed by cross-referencing EHR data. Pairs with birth dates differing by no more than one day and  
148 having unique participant identifiers and first names were considered verified monozygotic twin pairs.  
149 Unverified samples were quarantined as potentially mislabeled and will be re-genotyped.

## 150 Sex check

151 To confirm sample gender, we extracted markers genotyped on the X chromosome while  
152 excluding the pseudoautosomal region, used the sex-check command from PLINK, and compared the  
153 expected F coefficient on the X chromosome to the gender recorded in the sample's EHR for all  
154 samples<sup>11</sup>. Participants whose reported gender differed from that inferred by PLINK were quarantined  
155 from subsequent analysis. We also removed remaining samples on plates with 4 or more gender  
156 mismatches to account for potential plate swaps. The threshold is relatively low because of the low  
157 percentage of females in our dataset.

## 158 **Advanced marker QC**

### 159 **Advanced marker QC pipeline**

160 We implemented three main approaches to create the advanced marker QC pipeline: (1)  
161 exclude probeset calls from all batches for probesets that failed advanced QC tests; (2) exclude probeset  
162 calls in a given batch for which the probeset is not recommended; and (3) choose the best probeset per  
163 marker for markers interrogated by multiple probesets, and exclude probesets calls from all batches for

164 the “not-best” probesets. Details of each steps of the advanced marker QC are available in Supplemental  
165 Materials and Methods and in Figure S4, Figure S6A, and Figure S7A.

166 The advanced marker QC pipeline produced an inclusion list of probesets that met quality  
167 standards across the entire MVP dataset. For each batch, we included a probeset in the dataset if it met  
168 all three criteria: 1) included in the inclusion list; 2) recommended in that batch; and 3) was the best  
169 probeset for a marker interrogated by multiple probesets. We then generated a list of probesets per  
170 batch, created PLINK marker list binary files for each batch, and then merged all batches together using  
171 the PLINK merge command.

## 172 **Reproducibility of genotype calling**

173 To assess the consistency of genotype calls across time and vendors, we analyzed the  
174 discordance between 25,867 intentional duplicate samples that were sent to the vendors blinded. After  
175 confirming these sample pairs were genetically identical through KING relatedness inference, we  
176 determined the number of minor allele pairs (MAPs) for each marker. A MAP is any pair of genotypes for  
177 a marker where both pairs are called and the pair contains at least one minor allele. We then calculated  
178 the number of discordant genotyping pairs per MAP for each marker. Normalizing by the number of  
179 MAPs renders different MAF bins comparable in the discordance calculation. Otherwise, rare markers  
180 will always have extremely low discordance rates, as most samples carry the homozygous major  
181 genotype.

182 Additionally, within the 485,856 samples genotyped in the MVP cohort, we included 2,064  
183 positive control samples. We called the genotypes of the positive controls along with other MVP  
184 samples across 112 batches organized by genotyping scan date for 668,418 markers passing advanced  
185 marker quality control. These genotypes were compared to the consensus positive control genotype.



186 To construct the consensus genotype sequence, we calculated the frequency of each marker  
187 across the panel of 2,064 positive control samples. Markers with MAF of less than 1% were set to  
188 homozygous in the consensus sequence, and markers with MAF of greater than 49% were set to  
189 heterozygous in the consensus sequence. For markers with MAF greater than or equal to 1% and less  
190 than or equal to 49% (536, or 0.082% of markers) or that had no observed calls (18,158, or 2.76%), we  
191 set the consensus genotype to missing.

192 We calculated concordance across all common ( $MAF \geq 5\%$ ) and low frequency ( $MAF < 5\%$ )  
193 markers, where MAFs were assessed over the entire MVP sample. We then calculated concordance  
194 between the consensus sequence and each positive control. Concordance was defined as the number of  
195 matching called genotypes over the total number of called genotypes. Uncalled markers in either the  
196 positive control or the consensus sequence were not included in either the numerator or the  
197 denominator of the concordance calculation. We then plotted the concordance distribution for each  
198 batch's positive controls across time.

## 199 **Comparing MVP allele frequencies to those from gnomAD and UK Biobank**

200 Genome Aggregation Database (gnomAD) version 2.1 data were downloaded from  
201 <https://gnomad.broadinstitute.org/downloads>. Markers in both gnomAD and MVP were matched on  
202 chromosome, start position, end position, reference allele, and alternative allele. For any mismatch, we  
203 checked strands and indel notations. Reference and alternative alleles were corrected and frequencies  
204 recomputed when strands were flipped. Indels had their genomic coordinates and alleles recoded and  
205 harmonized.

206 UK Biobank summary data were downloaded from <https://gbe.stanford.edu>. Markers shared  
207 between the UK Biobank and MVP were matched using SNP rsIDs. Since information on marker  
208 chromosome, genomic positions, reference allele, and alternate allele were not provided in the

209 summary statistics, we were unable to check for swapped alleles. However, we expect variant  
210 annotation in MVP and the UK Biobank to be well harmonized as both were genotyped on Axiom®  
211 arrays and following the same standard Axiom® marker QC workflow.

212 For this analysis, European Americans (EA) were defined as samples with greater than 0.9 GBR  
213 proportion based on ADMIXTURE results (described below), resulting in a sample size of 311,365. We  
214 used PLINK to compute allele frequencies by genetic ancestry subgroup via “--freq” using default filters  
215 and quality control parameters.

## 216 **Genetic relatedness**

217 We performed additional preprocessing of the MVP dataset before performing the genetic  
218 relatedness analysis. We applied standard PLINK 1.9 filters for genotype missingness (>5% removed),  
219 MAF (<1% removed), and sample missingness (>5% removed)<sup>11</sup>. We then conducted pairwise  
220 relatedness inference using KING 2.1 to identify related pairs<sup>10</sup>. KING explicitly accounts for population  
221 structure and is therefore an appropriate algorithm for our sample, which contains diverse genetic  
222 ancestry. However, KING is also known to overestimate relatedness in the presence of recent admixture.  
223 Therefore, we selected SNPs with low load in PCs 1-3 for a second round of KING as in the UK Biobank<sup>12</sup>.

224 The first round of KING was run with the command “--related --degree 3” to identify all potential  
225 pair of individuals with closer than 3rd degree relatedness. From this result, we excluded all individuals  
226 with more than 200 3rd degree relatives and also families with more than 100 members as suspected  
227 sample processing artifacts such as low-level sample contamination. Then, a set of unrelated individuals  
228 was defined using the `largest_independent_vertex_sets()` function in the Python version of the `igraph`  
229 tool. Principal component analysis (PCA) was then conducted with the unrelated samples. Only SNPs  
230 with greater than 0.01 MAF and less than 0.015 missingness were considered for this PCA. 23 regions of  
231 high LD defined in the UK Biobank<sup>18</sup> were also excluded, and then SNPs were pruned using an  $R^2$   
232 threshold of 0.1, window of 1000 markers, and step size of 80. In the end, 90,288 SNPs were selected for

233 PCA, which was conducted using PLINK v2.00a2LM with the command “--pca var-wts approx” to obtain  
234 variant weights and fast PCA approximation. Low weight SNPs in PC1, PC2, and PC3 were selected by  
235 adjusting the absolute weight threshold to keep at least two thirds of the input SNPs which led to 60,118  
236 SNPs being put forward for the next round of KING.

237 The second round of KING was again conducted with the command “--related --degree 3”. The  
238 effect of using SNPs with low weights in PCs 1-3 on the distribution of number of relatives per individual  
239 is shown in Figure S10 A-B. We flagged 35 individuals with more than 200 3<sup>rd</sup> degree relatives (UK  
240 Biobank reported 9 individuals with more than 200 3<sup>rd</sup> degree relatives), as well as all members of two  
241 clusters that were tightly interconnected with each other (Supplemental Materials and Methods and  
242 Figure S10 C-D, Figure S11).

243 We defined genetically identical pairs as those having a kinship coefficient of 0.45 or greater  
244 (the maximum kinship coefficient output by KING is 0.5). However, given the large number of intentional  
245 duplicates samples in our dataset, we only considered genetically identical pairs as monozygotic twin  
246 pairs after cross-referencing EHR data as above. Parent-child pairs were defined as those having a  
247 kinship coefficient of greater than or equal to 0.19 and less than 0.45 and having less than 0.0025  
248 percent of the genome held with zero alleles identical-by-state (IBS0). Sample pairs with a kinship  
249 coefficient greater than or equal to 0.19 and less than 0.45 and IBS0 greater than or equal to 0.0025  
250 were designated full siblings. Any pairs of participants with a kinship coefficient between 0.0884 and  
251 0.19 were inferred to be second-degree or third-degree relatives. To identify potential trios in our  
252 sample, we extracted parent-child pairs in which a sample appears twice. We then assessed the kinship  
253 coefficient between the other two participants. If the other two participants were not a related pair and  
254 consisted of one male and one female, we identified these three samples as a trio.

## 255 **Genetic ancestry**

256 For genetic ancestry analysis, we used the same set of markers used for relatedness analysis and  
257 applied LD pruning with PLINK (--indep-pairwise 1000 50 0.05), which left us with 50,000 markers.

## 258 **Principal component analysis**

259 For 1000 Genomes Project projection PCA, we merged the MVP dataset with the 1000 Genomes  
260 Project Phase 3 reference panel<sup>13</sup>. The 1000 Genomes Project dataset was first filtered to ensure  
261 scalable merging with the MVP dataset. Markers with MAF less than 1% and any samples constituting  
262 related pairs were removed prior to LD pruning with PLINK using the same parameters as above. We  
263 then calculated PCs using the 1000 Genomes Project dataset and projected the MVP samples onto them  
264 using EIGENSOFT, version 6.0.1<sup>14</sup>.

265 We also calculated the PCs on the filtered MVP dataset alone using the FastPCA method from  
266 the EIGENSOFT package for within-cohort PCA. For this PCA, we excluded all related individuals, whereas  
267 we kept all related individuals in the 1000 Genomes project PCA.

## 268 **ADMIXTURE analysis**

269 In order to quantify ancestry proportions in MVP, we ran the program ADMIXTURE, version 1.3,  
270 on the MVP samples in supervised mode using five reference populations from the 1000 Genomes  
271 Project dataset as training data<sup>15</sup>. We chose the five reference populations based on their global  
272 geographic location to ensure global representativeness. The Yoruba in Ibadan, Nigeria (YRI) samples  
273 serve as a proxy for West African ancestry, the Luhya in Webuye, Kenya (LWK) for East African ancestry,  
274 the British in England and Scotland (GBR) for European ancestry, the Han Chinese in Beijing, China (CHB)  
275 for East Asian ancestry, and the Peruvians from Lima, Peru (PEL) for Native American ancestry (Figure  
276 S8C). Participants with more than 80% of their genetic ancestry attributed to one reference population

277 were assigned to that reference. Remaining participants who had greater than 90% of their genetic  
278 ancestry derived from two reference populations were assigned to that pair of populations. Any  
279 participants not meeting the above two criteria were assigned to a separate subgroup (MVP\_OTHER)  
280 and were assumed to contain admixture from three or more reference populations.

## 281 **UMAP analysis**

282 We used Uniform Manifold Approximation Projection (UMAP), a dimensionality reduction  
283 method that is useful for visualizing both global and local structure in data, to further visualize the  
284 genetic ancestry of the MVP cohort. A UMAP embedding was calculated based on the first 10 principal  
285 components of unrelated samples using hyperparameters `n_neighbors` of 15 and `min_distance` of 0.1,  
286 which were suggested by a previous study on UK Biobank data<sup>16</sup>. We then visualized the population  
287 structure by projecting subpopulations identified by our ADMIXTURE analysis onto the UMAP  
288 embedding.

## 289 **GWAS of Height**

290 Height measurements, dates of measurement, dates of birth for each participant were extracted  
291 from the VA healthcare system's EHR. Any height measurement outside the range of 48 to 84 inches was  
292 excluded<sup>17</sup>, and inches were converted to meters. Age at measurement was calculated by subtracting  
293 the date of birth from the date of height measurement. Individuals younger than 18 or older than 120  
294 years old were excluded. Sex was genetically determined sex by PLINK.

295 Markers whose genotype missingness was greater than 1%, as well as non-autosomal markers,  
296 were removed. Samples whose missingness was over 5% were also excluded. Using the results of the  
297 relatedness analysis described below, we also removed all closely related pairs.

298 After marker and sample filtering, we ran association tests using BOLT-LMM<sup>18</sup> with sex, age, age-  
299 squared and the first 10 PCs as covariates. LD scores were calculated from the 1000 Genomes Project

300 population subsets using ldsc 1.0<sup>19</sup>. Model SNPs were generated using PLINK 2.0 by pruning unrelated  
301 samples with an R-squared threshold of 0.2 (--pairwise-indep 1000 50 0.2). Principal components (PCs)  
302 were also generated using PLINK 2.0 (--pca approx) on the cohorts that had model SNPs extracted.

303 We extracted the effect size, direction of effect, and allele for each previously associated marker  
304 from the GWAS catalog on March 21, 2019 and then extracted the effects for the markers present in the  
305 MVP association analysis. We then scaled the effect values within each study to between 0 and 1 to  
306 account for different height units and plotted the previously derived effects against those inferred in  
307 MVP.

## 308 **Results**

### 309 **The MVP 1.0 Array**

#### 310 **Array design and content**

311 The MVP 1.0 array was based on the Applied Biosystems™ Axiom® Biobank Genotyping Array  
312 with additional custom content further developed for MVP (Figure 1). The Axiom® Biobank Genotyping  
313 Array incorporates multiple content categories that are important for translational medicine research  
314 and discovery,<sup>20</sup> including modules for genome-wide coverage of common European variants, rare  
315 coding SNPs and indels, pharmacogenomics markers, expression quantitative trait loci (eQTLs), and loss-  
316 of-function markers (further described in Supplemental Materials and Methods). The MVP 1.0-specific  
317 modules were mainly SNPs and indels known to be associated with diseases and traits of interest to  
318 MVP (especially psychiatric disorders and rheumatoid arthritis), as well as a set of SNPs selected to  
319 improve African American imputation performance (Supplemental Materials). In total, 723,305  
320 probesets interrogating 686,682 unique bi-allelic markers (SNPs and indels) based on the GRCh37  
321 genome build were tiled onto the MVP 1.0 array. Among these, 270 are mitochondrial markers, 142 are

322 in the non-pseudoautosomal regions of the Y chromosome, 1,139 are in the pseudoautosomal regions  
323 (PAR1 and PAR2) of the X and Y chromosomes, 18,026 are in the non-pseudoautosomal regions of the X  
324 chromosome, and the remaining 667,105 markers are autosomal markers (Table S1).

## 325 **MVP 1.0 Genotyping Quality Control and Assessment**

### 326 **Assessment of overall genotyping performance**

327 Figure S3 is an overview of the steps taken to ensure high quality genotype data for the MVP  
328 cohort. Advanced genotype and sample QC were conducted in addition to the standard Affymetrix good  
329 practice guidelines and are described in Materials and Methods and Supplemental Materials and  
330 Methods. In addition, we further devised a batch variation correction step to apply to markers that  
331 showed significant allele frequency differences between releases (Supplemental Methods and Figure S4,  
332 Figure S6A).

333 We investigated multiple quality control metrics for across and within the two assay vendors.  
334 Median Axiom® DQC values for all genotyping batches were greater than 95 for either vendor (Figure  
335 S5A). Median QC call rate was also high, exceeding 99% for each genotyping batch (Figure S5 B-C).  
336 Overall, sample call rates and other genotype quality control metrics demonstrated high-quality  
337 genotype calls for MVP regardless of genotyping vendor (more detail in Supplemental Materials and  
338 Methods).

### 339 **Marker and sample QC and selection**

340 The MVP 1.0 array contains a large amount of novel, custom marker content that has not been  
341 validated on other arrays. These markers were assayed with more than one probeset, requiring  
342 advanced marker QC to determine which probesets for a given marker performed best across all  
343 genotyped batches and to remove systematically poor quality probesets. Ultimately, we retained  
344 668,418 markers representing 97.34% of the original markers and included 459,777 samples from a total

345 of 485,856 unique genotyped samples in this data release. As expected, almost 98% of the markers that  
346 were previously tested on the Axiom biobank array were associated with a probeset that passed quality  
347 control, whereas 77% of the markers in the MVP 1.0 custom modules were associated with a probeset  
348 that remained after quality control. Additionally, although sample missingness (the fraction of missing  
349 genotype calls per individual; see Supplemental Materials and Methods) was slightly higher for Vendor 1  
350 than for Vendor 2, almost all genotyped samples from both vendors exhibit missingness of less than 5%  
351 (Figure S6A).

352 We also either excluded or quarantined samples that did not meet sample QC criteria. Excluded  
353 samples include those expected to be removed by design or for known logistical or data errors. These  
354 samples include positive controls, samples with no or multiple unique participant identifiers, and  
355 samples in intentional duplicate pairs with the lower call rate. Quarantined samples are those that are  
356 temporarily removed from the dataset due to quality concerns. For instance, we investigated 1,149 pairs  
357 of samples with high relatedness to discriminate between misidentified intentional duplicates, technical  
358 duplicates (controls repeatedly genotyped by vendors), and monozygotic twins. While we confirmed 49  
359 monozygotic twins by cross-referencing with EHR data, the remaining 1,100 unintentional duplicate  
360 pairs could not be verified through independent means and were quarantined from data release as  
361 potentially mislabeled and will be re-genotyped. We also cross-checked genetically determined sample  
362 sex with EHR-reported gender information. Among the 485,856 unique genotyped samples, 2,000  
363 (0.41%) did not have any reported gender information from either the EHR or self-report, and 2,073  
364 (0.43%) of the remaining samples had a genetic sex that was opposite of the reported gender. We  
365 quarantined these samples for further analysis and potential re-genotyping (Table S2). The total number  
366 of samples that were excluded or quarantined from the current release of MVP genotype data and the  
367 reasons for doing so are summarized in Table 1. All quarantined samples removed from the current data



368 release will undergo further quality control validation, be sent back to the vendors for re-genotyping, or  
369 will be otherwise verified before being included in subsequent data releases.

### 370 **Marker missingness and discordance by MAF**

371 We assessed marker missingness in correlation with MAF. Overall, the MAF distribution of MVP  
372 1.0 is highly skewed toward rare variants with 42.89% of markers below 1% MAF and 33.89% below  
373 0.1% (Figure 2A). This result is by design, as the content of the MVP array focuses on markers associated  
374 with potential disease phenotypes. We find that MAF is correlated with marker missingness, as shown in  
375 Figure 2C and Figure S6B, with lower frequency variants missing in a larger fraction of samples. Despite  
376 this trend, missingness among low frequency markers is still relatively low. For example, 87.29% of rare  
377 markers (MAF < 0.1%) are missing in less than 5% of genotype calls.

378 Additionally, we examined marker genotype discordance rates across intentional duplicate  
379 sample pairs with respect to MAF. Discordance is calculated per minor allele pair (MAP) for each marker,  
380 and markers are binned by MAF. We find a correlation between MAF and discordance rate, with lower  
381 frequency variants having a higher rate of minor allele discordance (Figure 2B and Figure S6C).

### 382 **Duplicate and positive control samples for continuous quality assessment**

383 Importantly, because we employed two separate vendors for genotyping, we intentionally  
384 included 25,291 duplicate samples that were blinded to the vendors for independent assessment of  
385 genotype quality. This amounts to a target of 5% of all genotyped samples and is an effort to accurately  
386 assess genotyping quality on a continuous basis. Sample concordance among intentional duplicates or  
387 positive controls was very high with a median concordance rate greater than 99.8% across all  
388 comparisons (Figure S7A).

389 Assessing concordance in positive control samples also provides valuable information about the  
390 consistency and reproducibility of the MVP 1.0 array's genotypes over time. Along with the MVP  
391 samples, 2,064 positive control samples were genotyped on the MVP 1.0 array. As discussed in the

392 Materials and Methods section, we constructed a consensus genotype sequence across 657,459  
393 markers using this panel of positive controls. For markers in the consensus sequence, 543,691 (82.70%)  
394 were homozygous, 95,079 (14.46%) were heterozygous, and 18,689 (2.84%) were uncalled.  
395 Concordance for each of the 2,064 positive controls samples is defined as the number of markers that  
396 agree with the consensus sequence divided by the number of called markers in the consensus sequence.  
397 Overall positive control concordance is shown in Figure S7A, and the distributions by batch of  
398 concordance values across all positive controls are shown in Figure S7 B-D. The median concordance  
399 rate between each positive control sample and the consensus sequence was 99.93% for all markers,  
400 99.89% for common (MAF  $\geq 5\%$ ) markers, and 100.00% for low frequency (MAF  $< 5\%$ ) markers. The  
401 minimum observed concordance rate between a positive control and the consensus occurs when  
402 analyzing common markers, but this concordance rate is still high at 99.05%.

#### 403 **Concordance with HapMap samples**

404 To further test concordance and genotyping quality, we genotyped 96 HapMap samples (from  
405 Coriell cell lines) on the MVP 1.0 array. 210,630 markers are present in both the MVP 1.0 array and  
406 HapMap release 27, and among these markers, 205,647 (97.20%) are classified as recommended (see  
407 Supplemental Materials and Methods, Standard marker quality control). When these 205,647 markers  
408 were analyzed over the 96 HapMap samples, and when HapMap and Axiom<sup>®</sup> uncalled genotypes were  
409 removed from the numerator and denominator, the sample concordance across all population groups is  
410 99.70% (Table 2). Axiom<sup>®</sup> sample call rate for recommended markers is 99.85%.

#### 411 **Assessing rare allele genotyping quality**

412 Given the importance of rare markers in clinically-related studies, we evaluated the analytical  
413 validity of MVP 1.0 rare markers by observing the concordance of MAFs for rare markers with overlap  
414 between MVP 1.0 and either the gnomAD or the UK Biobank (Figure 2 D-E). These databases are large  
415 enough for detection of very low MAFs, and agreement of MVP 1.0 marker MAFs with MAFs from these

416 databases provides evidence for the accuracy of MVP 1.0 calls. MAFs were considered to agree when  
417 the lower bound of the regression slope's 95% confidence interval was  $\geq 0.9$ . This value leaves some  
418 margin of error for expected differences between the databases in population structure (non-Finnish  
419 Europeans vs. European Americans [EA]), technology (genotype arrays vs. exome sequencing), technical  
420 processes (batch, user, etc.), and sample size. We used the MVP EA subgroup to benchmark  
421 performance because it has a larger sample size which provides better confidence in assessing  
422 frequency of rare markers, and has large complementary subgroups in gnomAD and the UK Biobank. We  
423 classified markers into three subgroups by MAF: rare variants ( $< 1\%$ ), low frequency variants (1-5%), and  
424 common variants ( $>5\%$ ). The EA subgroup yielded 321,290 (48.1%) rare markers, 46,626 (6.97%) low  
425 frequency markers, and 300,375 (44.9%) common markers.

426         From the gnomAD database, we compared the allele frequencies derived from the non-Finnish  
427 European subgroup (N = 55,860) of the exome call set. This subgroup provided the largest cohort that  
428 was comparable in population structure. In total, a majority of MVP rare variants were found in gnomAD  
429 (69%, or 221,374 of 321,290 markers), and we found MAF agreement between MVP and gnomAD with a  
430 slope of 0.9290 (95% CI: 0.9002, 0.9578).

431         From the UK Biobank, we compared allele frequencies derived from the self-reported white  
432 British ancestry group (N > 330k). We found MAF agreement as supported by the strong coefficient of  
433 determination ( $R^2$ ) of 0.9864 and slope of 0.9536 (95%CI: 0.9841, 0.9887) between 46,872 overlapping  
434 markers.

435         While comparison against both sources met the  $\geq 0.9$  agreement threshold, we observed a small  
436 set of about 6000 extremely discrepant markers (defined as having MAF  $> 0.001$  in one database but  
437 MAF  $< 0.001$  in the other) between MVP and gnomAD. About 53% of these markers were also present in  
438 the UK Biobank. For these discrepant markers, MAFs in the UK Biobank were much closer to MVP MAFs  
439 than those in gnomAD, and only one quarter of the overlapping UK Biobank markers retained the

440 “extremely discrepant” label. This is expected and consistent with previous observations that MAFs of  
441 MVP and the UK Biobank are in close agreement. The extremely discrepant markers between MVP and  
442 gnomAD may be attributed to the gnomAD-exome database having a smaller sample size than the UK  
443 Biobank. The lowest MAF limit for MVP’s EA subgroup is  $1.6 \times 10^{-6}$  (1 of 622,730 total alleles),  $8.9 \times 10^{-6}$  (1  
444 of 111,720) for gnomAD’s non-Finnish subgroup, and  $1.4 \times 10^{-6}$  (1 of 674,398) for UK Biobank. At very low  
445 frequencies, the absolute difference between rare variants, but not necessarily the relative difference,  
446 will be small. A given marker with a MAF of 0.001 in MVP and 0.01 in gnomAD will have an absolute  
447 difference of 0.009, but a relative difference of 10-fold. This is a common situation in our pairwise  
448 marker comparisons since overlapping marker MAFs are heavily clustered near zero (Figure 2 D-E). This  
449 could also explain the relatively higher variance observed in the lower extremes when comparing MVP  
450 against gnomAD versus against the UK Biobank. Overall, our results nonetheless show that our rare  
451 variant calls are highly consistent and within a reasonable range of agreement with overlapping markers  
452 in gnomAD and the UK Biobank. However, it is important to note that precision of very rare variants  
453 assayed using SNP chips have been reported to show variable quality<sup>21</sup>. Thus, visual inspection of calls  
454 underlying initial association results are always required.

## 455 **Population analysis of MVP samples and a test GWAS on height**

### 456 **The MVP Cohort**

457 In addition to quality assessment of MVP 1.0 genotyping results, we also performed exploratory  
458 analysis of the current population represented in the MVP samples. Based on data from the VistA EHR,  
459 the genotyped participants in the MVP cohort have a median age of 65 years at time of enrollment, and  
460 8.33% are female. Although the percentage of female participants is low, reflecting the demographics of  
461 the Veteran population, this percentage corresponds to 46,924 female participants in the current  
462 release.

463           Considering the samples that have already been genotyped, the MVP cohort is relatively more  
464   diverse than other large biobanks on which data is available. For example, more than 94% of UK Biobank  
465   participants self-report as British, Irish, or “any other white background”<sup>4,12</sup>, and the Kaiser RPGEH  
466   biobank has 81% of samples reporting as “white, non-Hispanic”. The MVP cohort on the other hand, has  
467   70.9% of participants self-reporting as “white” and “non-Hispanic or Latino” and agrees with United  
468   States 2010 census information indicating 63.7% of respondents self-reporting as “White alone” and  
469   “Not Hispanic or Latino”<sup>22</sup>.

#### 470   **Analysis of relatedness**

471           We examined the degree to which samples in the MVP population are related. Of the  
472   approximately 105.70 billion possible MVP sample pairings, 15,384 pairs appeared to be third degree  
473   relatives or closer. The number of pairs for each type of relative pair, including trios, is shown in Table  
474   S8. Compared with the UK Biobank, this installment of MVP samples has a reduced fraction of related  
475   pairs.

#### 476   **Analysis of genetic ancestry**

477           Assessing genetic ancestry for genotyped samples is an important tool for many applications,  
478   such as correcting for biases caused by population structure, constructing tests for natural selection, and  
479   determining disease risk by genetic ancestry, among other tasks<sup>23</sup>. To assess genetic ancestry in our  
480   sample, we visualized and then quantitatively assessed genetic ancestry of MVP samples relative to  
481   external reference populations.

482           Runs of homozygosity (ROH) were measured using PLINK with a minimum ROH length of 1,000  
483   Kb. The median total length of ROH is approximately 15.65 Mb, and the median number of blocks per  
484   sample is 10. In Figure 3A, we plotted the total length of ROH per individual by genetic ancestry  
485   subgroup for the five most common subgroups as defined in the Materials and Methods. MVP\_GBR\_PEL

486 samples have a wide distribution of total ROH length but also some of the longest total lengths of all  
487 samples. Samples with African ancestry or admixed between three or more reference populations  
488 (MVP\_OTHER) have the shortest total length of ROH per sample. Samples of mainly European ancestry  
489 have intermediate total ROH length. The total length of ROH per sample varies depending on the genetic  
490 ancestry subgroup.

491 We also compared MVP samples to those in the 1000 Genomes Project. We first ran a PCA on  
492 the 1000 Genomes Project phase 3 samples and then projected the MVP samples onto these PCs. We  
493 find that most MVP samples lie close to reference populations of European origin. In addition, when we  
494 performed PCA on MVP samples alone, we found that genetic ancestry subgroups contain more  
495 complex intercontinental population structure, with a sizeable fraction of MVP samples exhibiting  
496 admixture with respect to African and Asian references samples (Figure 3B, Figure S9).

497 To assess ancestry proportion for each sample in MVP, we ran the program ADMIXTURE in  
498 supervised mode using five 1000 Genomes Project Phase 3 reference populations: Han Chinese in  
499 Beijing, China (CHB); British in England and Scotland (GBR); Luhya in Webuye, Kenya (LWK); Peruvians  
500 from Lima, Peru (PEL); and Yoruba in Ibadan, Nigeria (YRI)<sup>15</sup>. Most participants have the largest  
501 percentage of their genome aligning with the GBR population (Figure S8C). However, a substantial  
502 fraction of samples contains a moderate amount of genetic ancestry similar to the YRI reference  
503 population. Examples were also found of participants who have almost 100% of their genetic ancestry  
504 aligning to each of the five reference populations except for LWK. Using ADMIXTURE analysis results, we  
505 grouped the MVP samples into sixteen subgroups and determined the proportion of MVP samples  
506 belonging to each (Figure 3C). For example, 326,777 samples have over 80% of their genome aligning  
507 with the GBR reference population (MVP\_GBR) whereas 58,267 samples have 80% or more of their  
508 genome aligning with YRI (MVP\_YRI). Excluding samples with more than 80% of their genome aligning to  
509 one reference population, 25,295 of the samples have 90% or more of their genome aligning with a

510 combination of GBR and YRI reference populations (MVP\_GBR\_YRI). Approximately 16,351 samples  
511 (MVP\_OTHER) have neither 80% of their genome aligning with one reference population nor 90%  
512 aligning with a combined pair, indicating substantial admixture between three or more reference  
513 populations.

514 Finally, we visualized the diverse ancestry composition of MVP using a non-parametric  
515 dimensionality reduction method called UMAP (Figure 3D). As shown through PCA and ADMIXTURE, the  
516 largest cluster corresponds to samples with largely European ancestry. In this visualization, the distance  
517 between samples and clusters is not to be directly interpreted as genetic distance. Although there are  
518 distinct clusters (such as individuals with Asian ancestry forming a tight cluster within themselves on the  
519 top left corner, and another small cluster of likely Polynesians in the middle of the plot), most MVP  
520 samples of different ancestries form a large single cluster rather than clusters with distinct breaks. This  
521 large cluster shows a continuum of ancestry proportion that transitions from GBR on the top right to  
522 different levels of admixture with YRI and PEL proportions. This is in line with a previous report based on  
523 32,000 US individuals in the National Geographic Genographic Project cohort<sup>24</sup>.

## 524 **GWAS of height**

525 To further validate the quality of our genotype data and the utility of MVP 1.0 array, we  
526 conducted a GWAS of height in both the EA and African American (AA) MVP subpopulations. EAs were  
527 defined as individuals with greater than 90% GBR proportion, and AA were defined as individuals with  
528 greater than 60% YRI and less than 40% GBR based on ADMIXTURE results (Figure S8 A-B). Our GWAS of  
529 height within EA and AA cohorts showed moderate inflation of  $\lambda_{GC}=1.12$  and  $\lambda_{GC}=1.13$ , with pseudo-  
530 heritability of 0.396 and 0.378, respectively<sup>19,25,26</sup>, a level comparable to previous association studies in  
531 height without genotype imputation<sup>27</sup>.

532 Of the 822 reported associations with height listed in the GWAS catalog<sup>28</sup>, 230 were present in  
533 the MVP EA GWAS, and 209 were present in the MVP AA GWAS. We assessed whether we could

534 replicate effect sizes and direction of effects for markers present in MVP EA and AA GWAS by plotting  
535 these against the GWAS catalog effect sizes and direction of effects (Figure 4). For the two  
536 subpopulations, the MVP associations perfectly replicated the directions of effect in most markers (two  
537 SNPs had near 0 effect size in EA). However, as most GWAS catalog associations are derived from  
538 Europeans, the overall correlation across all markers was lower for the AA cohort ( $r=0.69$ ) compared to  
539 the EA cohort ( $r=0.85$ ).

540 Overall, we show that the performance of MVP 1.0 and the quality of its genotyping across  
541 459,777 individuals of diverse ethnic background is very consistent and accurate by a variety of metrics.

## 542 **Discussion**

543 In this report, we provide an overview of the design of the MVP 1.0 genotyping array, the  
544 development of accompanying quality control analyses, and of our initial data exploration of an interim  
545 MVP genotyping dataset that consists of nearly 460,000 Veterans. Our results demonstrate that the  
546 MVP 1.0 chip and the subsequent QC procedures have addressed notable challenges characteristic of  
547 large projects with individuals of diverse genetic background, and that the resulting genotype calls is of  
548 high-quality akin to other projects similar in scope. By using a single chip and unified quality control  
549 across the diverse cohort, we aimed to minimize batch effects between different ancestries and provide  
550 an initial genome-wide scan before whole genome sequenced samples become available.

## 551 **Addressing the challenges of MVP**

552 MVP's large, diverse and still-growing cohort poses numerous challenges for designing  
553 genotyping procedures and their subsequent quality assessment/quality control protocols. Genotyping  
554 large and ethnically diverse cohorts along with clinically relevant markers is even more challenging due  
555 to the finite number of probesets that can fit on a single array. However, using different arrays for



556 different ethnic groups can also exacerbate the differences between these groups and lead to batch  
557 effects.

558         To address the limitations of array-based genotyping in diverse cohorts, we carefully selected  
559 array content to maximize clinical utility while at the same time ensuring both broad coverage of  
560 variants and robust imputation capabilities across different ethnic groups. We also developed  
561 comprehensive quality controls for markers and samples both before and after genotyping, including:  
562 intentional duplication of ~5% randomly selected samples over time, blinded to assay technicians, to  
563 detect and mitigate batch variation; assessment of genotyping concordance using positive control  
564 samples and HapMap samples (Figure S7A, Table 2); comparing MVP 1.0 MAFs to those in gnomAD and  
565 the UK Biobank (Figure 2); and conducting a GWAS of height to replicate previously reported results  
566 (Figure 4). Overall, we retained and released 459,777 samples and 668,418 markers after QC for the  
567 initial release of data. Although QC metrics vary slightly over time and genotyping vendors, the final  
568 genotyped sample set show consistently high call rates (98.5%) and genotype concordance over  
569 intentional duplicates (99.8%) both within and between vendors and over time. Furthermore, marker  
570 concordance is also high even for rare markers. Additionally, genotype concordance, MAF, and GWAS  
571 association results are generally in strong agreement with external or previously reported results. These  
572 results indicate that the design of the MVP 1.0 array and the associated quality control and assessment  
573 procedures provide a robust, reliable method for both genotyping common, low-frequency, and rare  
574 variants in a large, ethnically diverse cohorts.

575         Challenges remain, however, and the MVP 1.0 array has several limitations. Notably, although  
576 concordance rates were high, our results demonstrate that low-frequency and rare variants are still  
577 more difficult than common variants to genotype accurately using the MVP 1.0 array. Additionally, while  
578 we added markers to MVP 1.0 to increase coverage for African Americans, we lack boosters for other

579 ethnic groups, such as Asian and Native American populations, which currently comprise smaller but  
580 growing proportions in the MVP population.

### 581 **The MVP dataset is ethnically and genetically diverse**

582 Our exploratory analysis indicates that the MVP dataset and samples offer unique value for  
583 disease research. One particularly valuable aspect of the MVP dataset is the ethnic diversity it  
584 encompasses. Genetic ancestry analysis suggests that the MVP dataset contains sub-populations with  
585 both homogeneous and admixed genetic ancestry from multiple global populations. The largest sub-  
586 population corresponds to 71% samples of mostly European descent, with the remaining samples  
587 showing substantial African, East Asian, and Native American ancestry.

588 Since MVP recruits participants from United States Veterans who receive care at VA hospitals,  
589 the demographics of the MVP dataset diverge from those of the United States population.  
590 Approximately 8.5% of MVP samples are female, which is similar to the fraction of women in the  
591 Veteran population<sup>29</sup>. MVP participants are also substantially older than the United States population  
592 with a median age of 68 as opposed to 37.9 years<sup>30</sup>. However, the demographics of MVP may change  
593 with increasing use of the VA by more recent Veterans who have completed their service. The  
594 proportion of female Veterans is projected to continuously grow and nearly double to 16.5% by 2043<sup>29</sup>.  
595 Meanwhile, the proportion of Veterans from minority populations is expected to increase by  
596 approximately 50% over the same time period<sup>29</sup>. Thus, the VA and MVP is in a unique position for  
597 further inclusion of participants from diverse backgrounds.

### 598 **The MVP dataset is an invaluable disease research resource**

599 MVP has several unique features that make it an invaluable resource for human disease  
600 research. As evidence of the general utility of this resource, initial reports using an earlier tranche of  
601 ~300,000 genotyped participants have reported substantial new findings regarding the genetics of blood

602 lipids, a major cardiovascular risk factor<sup>31</sup>. Not only is MVP ideal for studying the burden of chronic  
603 disease, which increases with age, many of the clinical records in its EHR span several decades, allowing  
604 for robust longitudinal analysis. This is possible as patients using the VA health services do not lose  
605 coverage even after changing employers or residence. Additionally, MVP provides an opportunity to  
606 study diseases disproportionately affecting US veterans, such as PTSD<sup>32</sup>, alcohol and substance abuse  
607 disorders<sup>33</sup>, as well as other deployment-related conditions and their impact on human health.

608 In conclusion, the high-quality genotype data generated using the MVP 1.0 array provides a  
609 valuable resource for researchers investigating the effect of both rare and common genetic variants  
610 within MVP. This quality-controlled genotype data as well as the results from genetic ancestry and  
611 relatedness analyses are made available to all approved researchers. The genotype data can be linked to  
612 the full EHR of participants, often covering decades of care provided by the VA. MVP is a continuously  
613 expanding research cohort made available by participants with diverse backgrounds and altruistic  
614 intentions to support research that will benefit their fellow Veterans and others.

## 615 **Supplemental Data**

616 Supplemental Data include 11 Figures and 6 Tables.

## 617 **Author Contribution**

618 HH-Z, YS, ML, BRG, SJ, NS, TW, AL, PD Performed analysis, TW, LR, JS, TJO, SP Designed array, YS, PH, PD,  
619 PK, SP Built Data and software pipelines platforms and optimized them, DH, MB Performed wet lab  
620 assays for blood processing and isolating DNA, HH-Z, YS, ML, BRG, SJ, NS, TLA, JH, CP, JM, SM, GDH, RP, JC,  
621 JMG, JG, CJO, ERH, HZ, TJO, PST, SP are members of MVP genomic working group, SP conceived and  
622 supervised the work.

623

## 624 **Declaration of Interests**

625 The authors declare no competing interests

## 626 **Acknowledgments**

627 This work was funded by the VA Office of Research and Development and the VA Special  
628 Fellowship in Medical Informatics. We would like to thank all Veteran participants in the MVP for  
629 donating their samples, information, and time to this project.

630 In addition, We acknowledge the Million Veteran Program (MVP) Consortium: MVP Executive  
631 Committee, J. Michael Gaziano, MD, MPH (VA Boston Healthcare System, Boston MA), Rachel Ramoni,  
632 DMD, ScD (Office of Research and Development, Veterans Affairs Central Office; Washington, DC), Jim  
633 Breeling, MD (ex-officio) (Office of Research and Development, Veterans Affairs Central Office;  
634 Washington, DC), Kyong-Mi Chang, MD (Philadelphia Veterans Affairs Medical Center; Philadelphia, PA),  
635 Grant Huang, PhD (Office of Research and Development, Veterans Affairs Central Office; Washington,  
636 DC), Sumitra Muralidhar, PhD (Office of Research and Development, Veterans Affairs Central Office;  
637 Washington, DC), Christopher J. O'Donnell, MD, MPH (VA Boston Healthcare System, Boston, MA), Philip  
638 S. Tsao, PhD (VA Palo Alto Health Care System; Palo Alto, CA), MVP Program Office, Sumitra Muralidhar,  
639 PhD (Office of Research and Development, Veterans Affairs Central Office; Washington, DC), Jennifer  
640 Moser, PhD (Office of Research and Development, Veterans Affairs Central Office; Washington, DC),  
641 MVP Recruitment/Enrollment, Recruitment/Enrollment Director/Deputy Director, Boston – Stacey B.  
642 Whitbourne, PhD; MVP Coordinating Centers, Clinical Epidemiology Research Center (CERC), West  
643 Haven – John Concato, MD, MPH (VA Connecticut HealthCare System; West Haven, CT), Cooperative  
644 Studies Program Clinical Research Pharmacy Coordinating Center, Albuquerque – Stuart Warren, JD,  
645 Pharm D; Dean P. Argyres, MS (Albuquerque VA Medical Center; Albuquerque, NM), MVP Information

646 Center, Canandaigua – Brady Stephens, MS, Core Biorepository, Boston – Mary T. Brophy MD, MPH;  
647 Donald E. Humphries, PhD (VA Boston Healthcare System, Boston, MA), Data Operations/Analytics,  
648 Boston – Xuan-Mai T. Nguyen, PhD (VA Boston Healthcare System, Boston, MA), MVP Science –  
649 Christopher J. O’Donnell, MD, MPH; Genomics - Saiju Pyarajan PhD; Philip S. Tsao, PhD (VA Boston  
650 Healthcare System, Boston, MA & VA Palo Alto Health Care System; Palo Alto, CA), Phenomics – Kelly  
651 Cho, MPH, PhD (VA Boston Healthcare System, Boston, MA), Data and Computational Sciences – Saiju  
652 Pyarajan, PhD (VA Boston Healthcare System, Boston, MA), MVP Local Site Investigators: Atlanta VA  
653 Medical Center (Peter Wilson, MD); Bay Pines VA Healthcare System (Rachel McArdle, PhD), Birmingham  
654 VA Medical Center (Louis Dellitalia, MD), Cincinnati VA Medical Center (John Harley, MD), Clement J.  
655 Zablocki VA Medical Center (Jeffrey Whittle, MD), Durham VA Medical Center (Jean Beckham, PhD),  
656 Edith Nourse Rogers Memorial Veterans Hospital (John Wells, PhD), Edward Hines, Jr. VA Medical Center  
657 (Salvador Gutierrez, MD), Fayetteville VA Medical Center (Gretchen Gibson, DDS), VA Health Care  
658 Upstate New York (Laurence Kaminsky, PhD), New Mexico VA Health Care System (Gerardo Villareal,  
659 MD), VA Boston Healthcare System (Scott Kinlay, PhD), VA Western New York Healthcare System  
660 (Junzhe Xu, MD), Ralph H. Johnson VA Medical Center (Mark Hamner, MD), Wm. Jennings Bryan Dorn  
661 VA Medical Center (Kathlyn Sue Haddock, PhD), VA North Texas Health Care System (Sujata Bhushan,  
662 MD), Hampton VA Medical Center (Pran Iruvanti, PhD), Hunter Holmes McGuire VA Medical Center  
663 (Michael Godschalk, MD), Iowa City VA Health Care System (Zuhair Ballas, MD), Jack C. Montgomery VA  
664 Medical Center (Malcolm Buford, MD), James A. Haley Veterans’ Hospital (Stephen Mastorides, MD),  
665 Louisville VA Medical Center (Jon Klein, MD), Manchester VA Medical Center (Nora Ratcliffe, MD), Miami  
666 VA Health Care System (Hermes Florez, MD), Michael E. DeBakey VA Medical Center (Alan Swann, MD),  
667 Minneapolis VA Health Care System (Maureen Murdoch, MD), N. FL/S. GA Veterans Health System  
668 (Peruvemba Sriram, MD), Northport VA Medical Center (Shing Shing Yeh, MD), Overton Brooks VA  
669 Medical Center (Ronald Washburn, MD), Philadelphia VA Medical Center (Darshana Jhala, MD), Phoenix

670 VA Health Care System (Samuel Aguayo, MD), Portland VA Medical Center (David Cohen, MD),  
671 Providence VA Medical Center (Satish Sharma, MD), Richard Roudebush VA Medical Center (John  
672 Callaghan, MD), Salem VA Medical Center (Kris Ann Oursler, MD), San Francisco VA Health Care System  
673 (Mary Whooley, MD), South Texas Veterans Health Care System (Sunil Ahuja, MD), Southeast Louisiana  
674 Veterans Health Care System (Amparo Gutierrez, MD), Southern Arizona VA Health Care System (Ronald  
675 Schifman, MD), Sioux Falls VA Health Care System (Jennifer Greco, MD), St. Louis VA Health Care System  
676 (Michael Rauchman, MD), Syracuse VA Medical Center (Richard Servatius, PhD), VA Eastern Kansas  
677 Health Care System (Mary Oehlert, PhD), VA Greater Los Angeles Health Care System (Agnes Wallbom,  
678 MD), VA Loma Linda Healthcare System (Ronald Fernando, MD), VA Long Beach Healthcare System  
679 (Timothy Morgan, MD), VA Maine Healthcare System (Todd Stapley, DO), VA New York Harbor  
680 Healthcare System (Scott Sherman, MD), VA Pacific Islands Health Care System (Gwenevere Anderson,  
681 RN), VA Palo Alto Health Care System (Philip Tsao, PhD), VA Pittsburgh Health Care System (Elif Sonel,  
682 MD), VA Puget Sound Health Care System (Edward Boyko, MD), VA Salt Lake City Health Care System  
683 (Laurence Meyer, MD), VA San Diego Healthcare System (Samir Gupta, MD), VA Southern Nevada  
684 Healthcare System (Joseph Fayad, MD), VA Tennessee Valley Healthcare System (Adriana Hung, MD),  
685 Washington, DC VA Medical Center (Jack Lichy, MD, PhD), W.G. (Bill) Hefner VA Medical Center (Robin  
686 Hurley, MD), White River Junction VA Medical Center (Brooks hRobey, MD), William S. Middleton  
687 Memorial Veterans Hospital (Robert Striker, MD).

688 The content of this manuscript does not represent the views of the Department of Veterans  
689 Affairs or the United States Government.

## 690 **Web Resources**

691 **gnomAD:** [https://storage.googleapis.com/gnomad-](https://storage.googleapis.com/gnomad-public/release/2.1/vcf/exomes/gnomad.exomes.r2.1.sites.chr*.vcf.bgz)  
692 [public/release/2.1/vcf/exomes/gnomad.exomes.r2.1.sites.chr\\*.vcf.bgz](https://storage.googleapis.com/gnomad-public/release/2.1/vcf/exomes/gnomad.exomes.r2.1.sites.chr*.vcf.bgz)

693 UK Biobank: [https://github.com/rivas-lab/public-](https://github.com/rivas-lab/public-resources/blob/master/uk_biobank/variant_filter_table.tsv)  
694 [resources/blob/master/uk\\_biobank/variant\\_filter\\_table.tsv](https://github.com/rivas-lab/public-resources/blob/master/uk_biobank/variant_filter_table.tsv)  
695

696 **Figures**

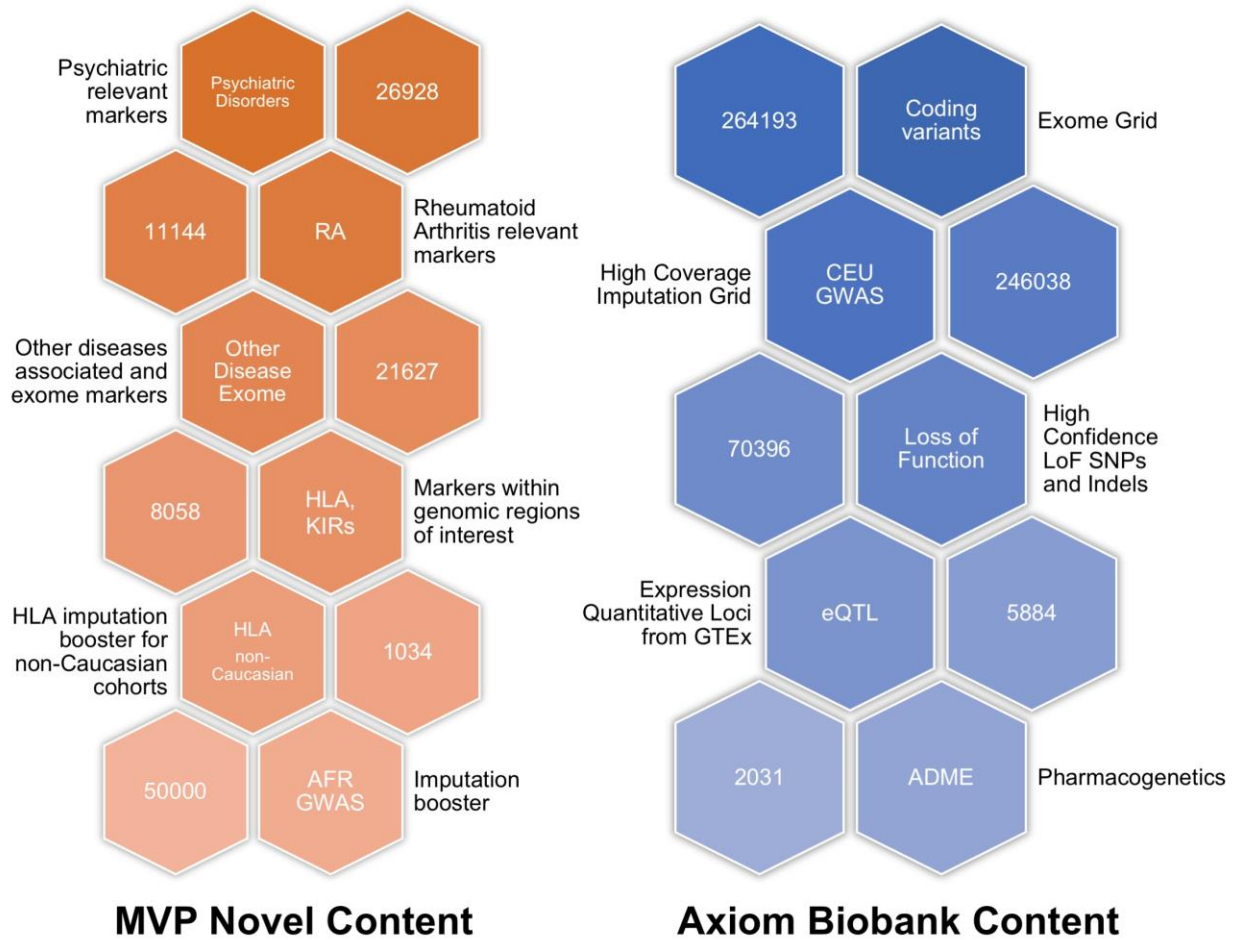

697

698 **Figure 1. Key MVP 1.0 genotyping array modules.** The modules are divided into those shared with the  
 699 Axiom® Biobank Genotyping Array and those unique to the MVP 1.0 array, along with descriptions and  
 700 counts of unique markers in each module. Counts represent the number of markers in the module, and  
 701 markers can be in more than one module.

702



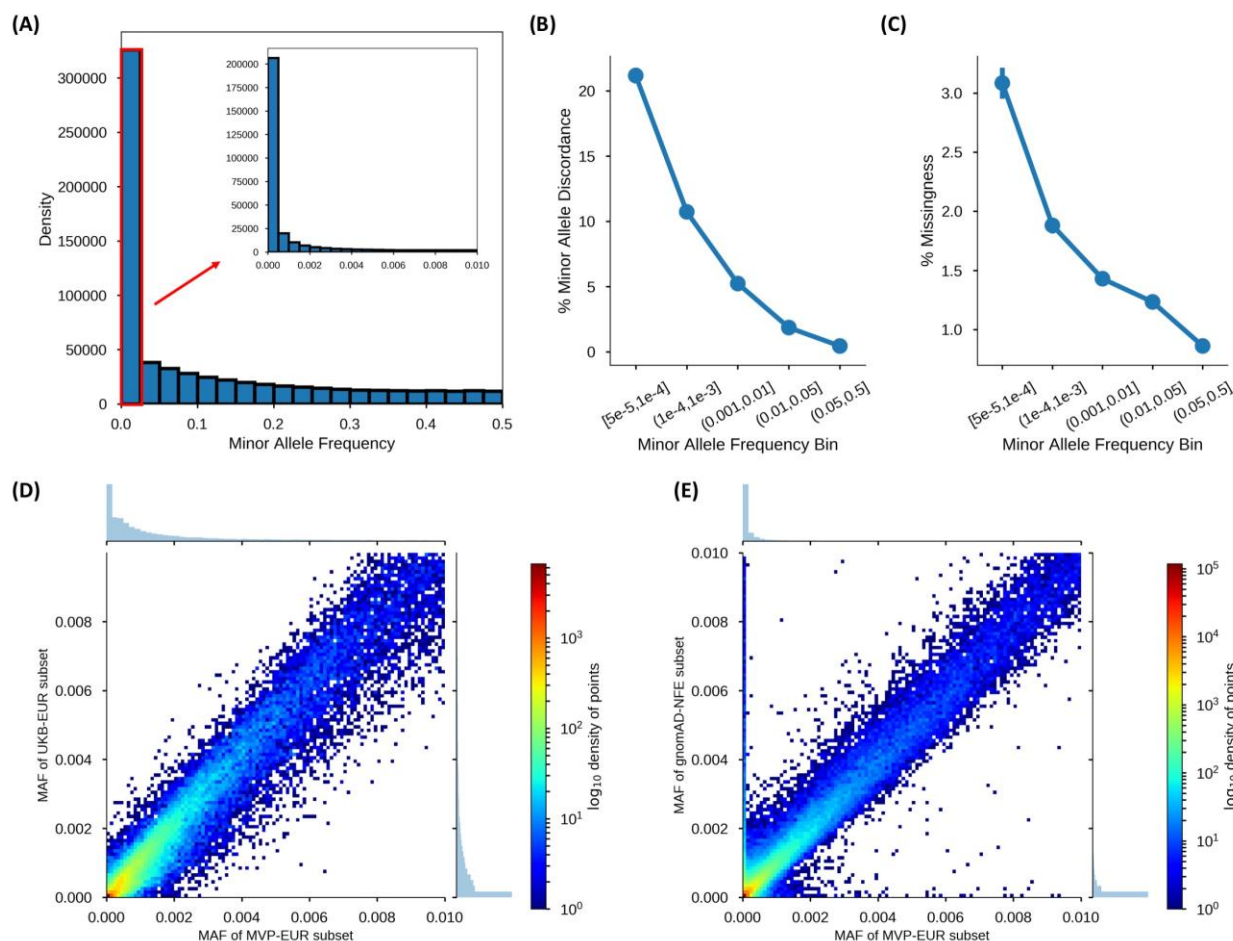

703

704 **Figure 2. Quality control assessments on the MVP dataset after performing the Advanced Marker**

705 **Quality Control procedures.** (A) MAF distribution after sample QC filtering. The inset diagram shows the

706 distribution for markers with a MAF below 1%. (B) Cumulative fraction of markers for intentional

707 duplicate discordance rates per MAP, separated by MAF bin. (C) Proportion of markers with fraction of

708 missing calls, separated into MAF bins as represented by grayscale color, after sample QC filtering. (D)

709 Comparison of MAFs between the EA subset of MVP (MVP-EUR) and the UK Biobank European subset

710 (UKB-EUR). (D) Comparison of MAFs between MVP-EUR and the non-Finnish European subset of

711 gnomAD (gnomAD-NFE).

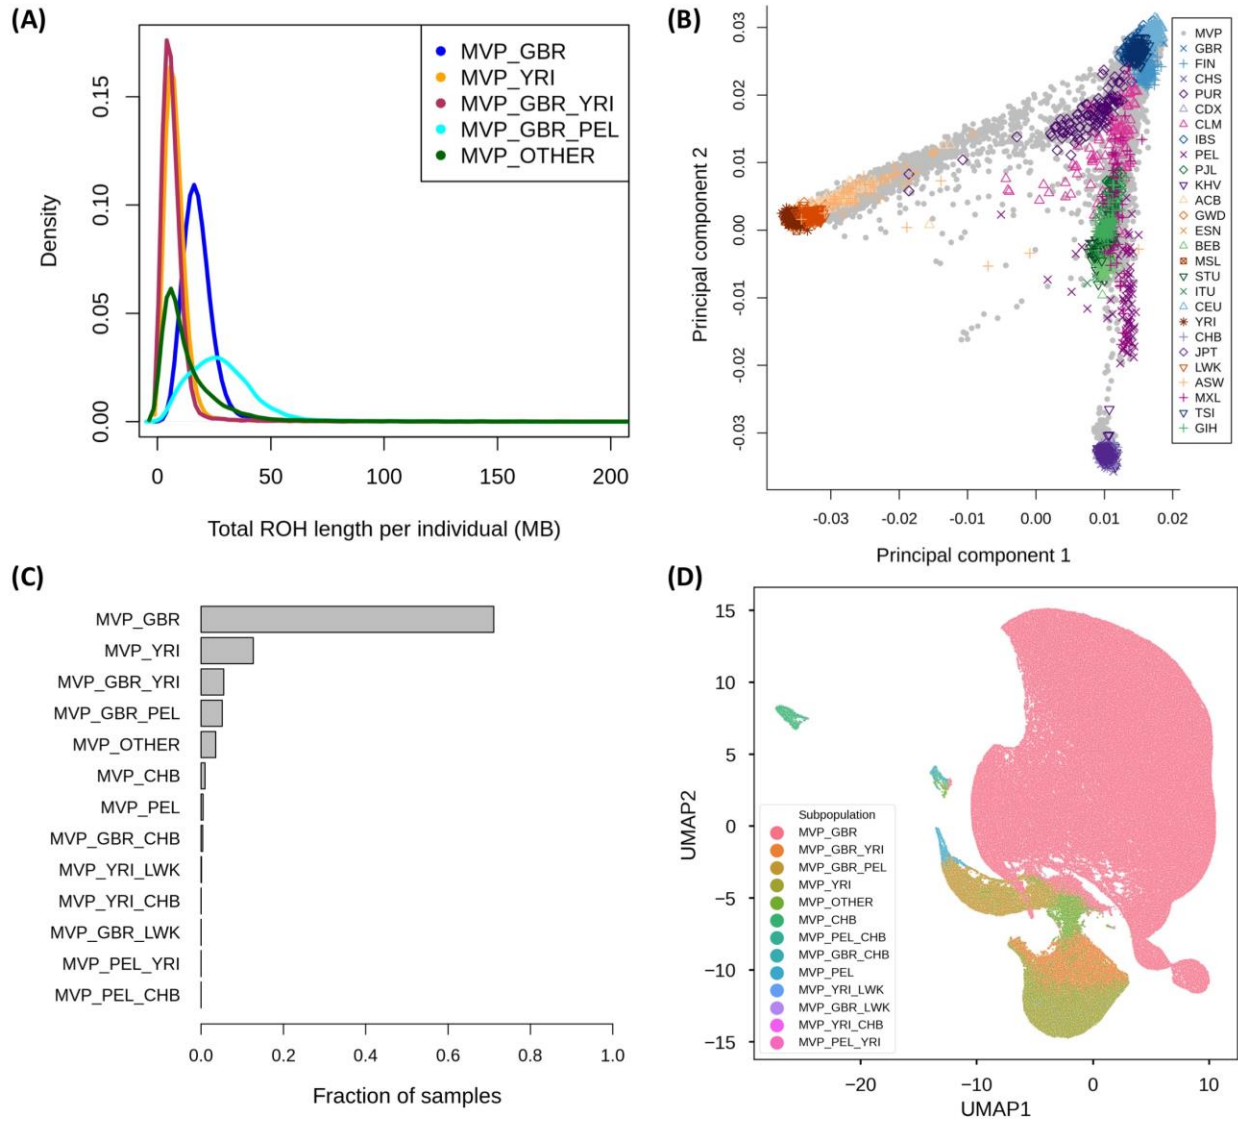

712

713 **Figure 3. Analysis of genetic ancestry in the MVP dataset.** (A) Density plots of the total length of runs of

714 homozygosity (ROH) per individual in each genetic ancestry subgroup. Only the top five most common

715 subgroups are shown. (B) Principal component analysis of the 1000 Genomes Project Phase 3 dataset

716 with MVP samples projected onto principal components 1 and 2. (C) The number of MVP samples in

717 each genetic ancestry subgroup as inferred by ADMIXTURE percentages and our thresholds. Subgroups

718 with no samples are not shown. (D) Visualization of ancestry subgroups using Uniform Manifold

719 Approximation Projection.

720

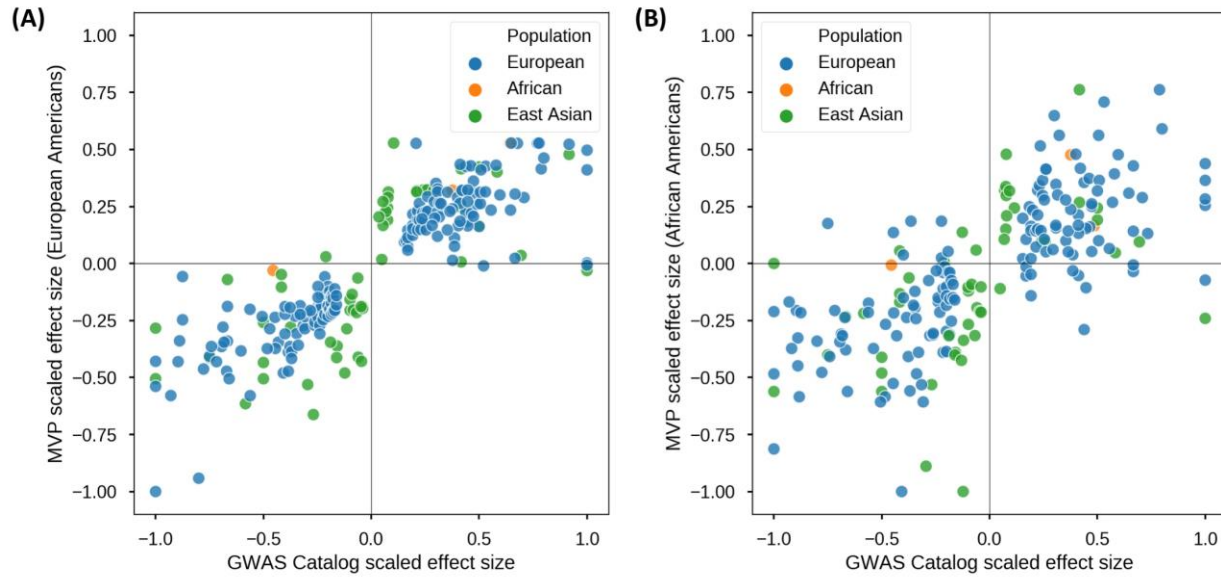

721

722 **Figure 4. GWAS of height with MVP cohort.** (A) Replication of the direction of effect for markers

723 previously associated with height as annotated in the NHGRI-EBI GWAS Catalog in the MVP cohort of

724 non-related European Americans (N=291,609). Color coding denotes the genetic ancestry of the original

725 cohort in which the markers were associated with height. (B) Same as (A) except using the MVP cohort

726 of non-related African Americans (N=73,190).

727 **Tables**

728 **Table 1. Quarantine and exclusion criteria for MVP samples, and sample count per category.**

| Category                                                                    | Number of samples | Percentage of samples |
|-----------------------------------------------------------------------------|-------------------|-----------------------|
| <b>Starting MVP sample set for analysis</b>                                 | 514,383           |                       |
| Intentional duplicate samples                                               | 25,291            |                       |
| Uniquely genotyped individuals                                              | 485,856           | 100.00%               |
| Samples with call rates below 98.5%                                         | 15,436            | 3.18%                 |
| Positive control samples                                                    | 3,236             | 0.66%                 |
| Samples with sex misclassification                                          | 1,450             | 0.29%                 |
| Samples on plates containing 4 or more sex misclassifications               | 2,619             | 0.53%                 |
| Unintentional duplicate samples                                             | 1,149             | 0.23%                 |
| Samples on plates containing an intentional duplicate with high discordance | 9,975             | 2.05%                 |
| Samples with high heterozygosity                                            | 248               | 0.05%                 |
| Samples with no or multiple unique participant identifiers                  | 71                | 0.01%                 |
| Intentional duplicate samples with high discordance                         | 413               | 0.08%                 |
| Samples with 7 or more “relatives”                                          | 466               | 0.09%                 |
| <b>Samples excluded from the dataset</b>                                    | <b>28,527</b>     | <b>5.87%</b>          |
| <b>Samples quarantined from the dataset</b>                                 | <b>31,836</b>     | <b>6.55%</b>          |
| <b>Final sample set in current data Release</b>                             | <b>459,777</b>    |                       |

729 Percentages are calculated from the total number of genotyped samples, including positive controls and  
 730 duplicate samples (514,383). Categories are not mutually exclusive (i.e., a sample can be removed due  
 731 to more than one category and is counted in each applicable category in the table).

732

733 **Table 2. Concordance rates across 96 HapMap samples genotyped on the MVP 1.0 array.**

| Population | Number of samples | Metrics over recommended <sup>a</sup> markers |                              | Metrics over all markers       |                              |
|------------|-------------------|-----------------------------------------------|------------------------------|--------------------------------|------------------------------|
|            |                   | Average sample concordance (%)                | Average sample call rate (%) | Average sample concordance (%) | Average sample call rate (%) |
| ALL        | 96                | 99.70                                         | 99.85                        | 99.35                          | 99.49                        |
| CEU        | 28                | 99.70                                         | 99.85                        | 99.34                          | 99.47                        |
| CHB        | 20                | 99.70                                         | 99.86                        | 99.37                          | 99.51                        |
| JPT        | 20                | 99.68                                         | 99.84                        | 99.35                          | 99.51                        |
| YRI        | 28                | 99.71                                         | 99.86                        | 99.34                          | 99.49                        |

734 <sup>a</sup> Recommended markers are those that were classified into one of the recommended SNP classes  
735 following execution of the Axiom® Best Practices Genotyping workflow for the 96 co-clustered samples.

736

## 737 **References**

- 738 1. Gaziano, J.M., Concato, J., Brophy, M., Fiore, L., Pyarajan, S., Breeling, J., Whitbourne, S., Deen, J.,  
739 Shannon, C., Humphries, D., et al. (2016). Million Veteran Program: A mega-biobank to study genetic  
740 influences on health and disease. *Journal of Clinical Epidemiology* 70, 214–223.
- 741 2. Banda, Y., Kvale, M.N., Hoffmann, T.J., Hesselton, S.E., Ranatunga, D., Tang, H., Sabatti, C., Croen, L.A.,  
742 Dispensa, B.P., Henderson, M., et al. (2015). Characterizing race/ethnicity and genetic ancestry for  
743 100,000 subjects in the genetic epidemiology research on adult health and aging (GERA) cohort.  
744 *Genetics* 200, 1285–1295.
- 745 3. Kvale, M.N., Hesselton, S., Hoffmann, T.J., Cao, Y., Chan, D., Connell, S., Croen, L.A., Dispensa, B.P.,  
746 Eshragh, J., Finn, A., et al. (2015). Genotyping informatics and quality control for 100,000 subjects in the  
747 genetic epidemiology research on adult health and aging (GERA) cohort. *Genetics* 200, 1051–1060.
- 748 4. Sudlow, C., Gallacher, J., Allen, N., Beral, V., Burton, P., Danesh, J., Downey, P., Elliott, P., Green, J.,  
749 Landray, M., et al. (2015). UK Biobank: An Open Access Resource for Identifying the Causes of a Wide  
750 Range of Complex Diseases of Middle and Old Age. *PLoS Medicine* 12, 1–10.
- 751 5. Manrai, A.K., Funke, B.H., Rehm, H.L., Olesen, M.S., Maron, B.A., Szolovits, P., Margulies, D.M.,  
752 Loscalzo, J., and Kohane, I.S. (2016). Genetic misdiagnoses and the potential for health disparities. *New*  
753 *England Journal of Medicine* 375, 655–665.
- 754 6. Petrovski, S., and Goldstein, D.B. (2016). Unequal representation of genetic variation across ancestry  
755 groups creates healthcare inequality in the application of precision medicine. *Genome Biology* 17, 16–  
756 18.
- 757 7. Popejoy, A.B., and Fullerton, S.M. (2016). Genomics is failing on diversity. *Nature* 538, 161–164.
- 758 8. Martin, A.R., Kanai, M., Kamatani, Y., Okada, Y., Neale, B.M., and Daly, M.J. (2019). Clinical use of  
759 current polygenic risk scores may exacerbate health disparities. *Nature Genetics*.
- 760 9. Affimetrix (2016). Axiom genotyping solution data analysis guide.
- 761 10. Manichaikul, A., Mychaleckyj, J.C., Rich, S.S., Daly, K., Sale, M., and Chen, W.M. (2010). Robust  
762 relationship inference in genome-wide association studies. *Bioinformatics* 26, 2867–2873.
- 763 11. Chang, C.C., Chow, C.C., Tellier, L.C.A.M., Vattikuti, S., Purcell, S.M., and Lee, J.J. (2015). Second-  
764 generation PLINK: Rising to the challenge of larger and richer datasets. *GigaScience* 4, 1–16.
- 765 12. Bycroft, C., Freeman, C., Petkova, D., Band, G., Elliott, L.T., Sharp, K., Motyer, A., Vukcevic, D.,  
766 Delaneau, O., O’Connell, J., et al. (2018). The UK Biobank resource with deep phenotyping and genomic  
767 data. *Nature* 562, 203–209.
- 768 13. Auton, A., Abecasis, G.R., Altshuler, D.M., Durbin, R.M., Bentley, D.R., Chakravarti, A., Clark, A.G.,  
769 Donnelly, P., Eichler, E.E., Flicek, P., et al. (2015). A global reference for human genetic variation. *Nature*.

- 770 14. Galinsky, K.J., Loh, P.R., Mallick, S., Patterson, N.J., and Price, A.L. (2016). Population Structure of UK  
771 Biobank and Ancient Eurasians Reveals Adaptation at Genes Influencing Blood Pressure. *American*  
772 *Journal of Human Genetics* 99, 1130–1139.
- 773 15. Alexander, D.H., Novembre, J., and Lange, K. (2009). Fast model-based estimation of ancestry in  
774 unrelated individuals. *Genome Research* 19, 1655–1664.
- 775 16. Diaz-Papkovich, A., Anderson-Trocme, L., and Gravel, S. (2019). Revealing multi-scale population  
776 structure in large cohorts. *BioRxiv*.
- 777 17. Noël, P.H., Copeland, L.A., Pugh, M.J., Kahwati, L., Tsevat, J., Nelson, K., Wang, C.P., Bollinger, M.J.,  
778 and Hazuda, H.P. (2010). Obesity diagnosis and care practices in the veterans health administration.  
779 *Journal of General Internal Medicine* 25, 510–516.
- 780 18. Loh, P.R., Kichaev, G., Gazal, S., Schoech, A.P., and Price, A.L. (2018). Mixed-model association for  
781 biobank-scale datasets. *Nature Genetics*.
- 782 19. Bulik-Sullivan, B., Loh, P.R., Finucane, H.K., Ripke, S., Yang, J., Patterson, N., Daly, M.J., Price, A.L.,  
783 Neale, B.M., Corvin, A., et al. (2015). LD score regression distinguishes confounding from polygenicity in  
784 genome-wide association studies. *Nature Genetics* 47, 291–295.
- 785 20. Datasheet.
- 786 21. Weedon, M.N., Jackson, L., Harrison, J.W., Ruth, K.S., Tyrrell, J., Hattersley, A.T., and Wright, C.F.  
787 (2019). Very rare pathogenic genetic variants detected by SNP-chips are usually false positives:  
788 implications for direct-to-consumer genetic testing. *BioRxiv* 696799.
- 789 22. United States Census Bureau (2011). The White Population: 2010 - c2010br-05.pdf. 2010 Census  
790 Briefs 1–20.
- 791 23. Padhukasahasram, B. (2014). Inferring ancestry from population genomic data and its applications.  
792 *Frontiers in Genetics* 5, 1–5.
- 793 24. Dai, C.L., Vazifeh, M.M., Yeang, C.-H., Tachet, R., Wells, R.S., Vilar, M.G., Daly, M.J., Ratti, C., and  
794 Martin, A.R. (2019). Population histories of the United States revealed through fine-scale migration and  
795 haplotype analysis. *BioRxiv* 577411.
- 796 25. Allen, H.L., Estrada, K., Lettre, G., Berndt, S.I., Weedon, M.N., Rivadeneira, F., Willer, C.J., Jackson,  
797 A.U., Vedantam, S., Raychaudhuri, S., et al. (2010). Hundreds of variants clustered in genomic loci and  
798 biological pathways affect human height. *Nature* 467, 832–838.
- 799 26. Wood, A.R., Esko, T., Yang, J., Vedantam, S., Pers, T.H., Gustafsson, S., Chu, A.Y., Estrada, K., Luan, J.,  
800 Kutalik, Z., et al. (2014). Defining the role of common variation in the genomic and biological  
801 architecture of adult human height. *Nature Genetics* 46, 1173–1186.
- 802 27. Yang, J., Manolio, T.A., Pasquale, L.R., Boerwinkle, E., Caporaso, N., Cunningham, J.M., De Andrade,  
803 M., Feenstra, B., Feingold, E., Hayes, M.G., et al. (2011). Genome partitioning of genetic variation for  
804 complex traits using common SNPs. *Nature Genetics*.



- 805 28. Welter, D., MacArthur, J., Morales, J., Burdett, T., Hall, P., Junkins, H., Klemm, A., Flicek, P., Manolio,  
806 T., Hindorff, L., et al. (2014). The NHGRI GWAS Catalog, a curated resource of SNP-trait associations.  
807 *Nucleic Acids Research* 42, 1001–1006.
- 808 29. National Center for Veterans Analysis and Statistics (2014). Table 3L: Living veterans by  
809 race/ethnicity, gender, 2013-2043.
- 810 30. CIA World Factbook, (Central Intelligence Agency) (2017). *The World Factbook 2017*.
- 811 31. Klarin, D., Damrauer, S.M., Cho, K., Sun, Y. V., Teslovich, T.M., Honerlaw, J., Gagnon, D.R., DuVall,  
812 S.L., Li, J., Peloso, G.M., et al. (2018). Genetics of blood lipids among ~300,000 multi-ethnic participants  
813 of the Million Veteran Program. *Nature Genetics*.
- 814 32. Gelernter, J., Sun, N., Polimanti, R., Pietrzak, Robert., Levey, D.F., Bryois, J., Lu, Q., Hu, Y., Li, B.,  
815 Radhakrishnan, K., et al. (2019). Genome-wide association study of post-traumatic stress disorder  
816 reexperiencing symptoms in >165,000 US veterans. *Nature Neuroscience* 22, 1394–1401.
- 817 33. Kranzler, H.R., Zhou, H., Kember, R.L., Vickers Smith, R., Justice, A.C., Damrauer, S., Tsao, P.S., Klarin,  
818 D., Baras, A., Reid, J., et al. (2019). Genome-wide association study of alcohol consumption and use  
819 disorder in 274,424 individuals from multiple populations. *Nature Communications*.
- 820
